# Supplementary material for: mRNA cap-binding protein eIF4E1 is a novel regulator of Toxoplasma gondii latency
Source: PubMed Central journal article supplement (PMC11237481; doi:10.1128/mbio.02954-23), 2024-05-15

**A.** *H.sapiens\_4E1* 33 HYIKHPLQNRWALWFF--KND---KSKTWQANLRLISKFDTVEDFWALYNHIQLSSNLMPGC-----DYSLFDKDGIEPMWEDEKNKRGGRWLITLTKQ-QRRSDLDRFWLETLLCLIGESFDDY---SDDVCGAVV 154  
*H.sapiens\_4EHP* 50 GPAEHPLQNYTFWYSRRTPGRPTSSQSYEQNIKQIGTFASVEQFWRFYSHMVRPGDLTGHS-----DFHLFKEGIKPMWEDDANKNGGKWIIRLR-----KGLASRCWENLILAMLGEQFMV---GEEICGAVV 171  
*H.sapiens\_4E3* 43 EPGGVPLHSSWTFWLD--RSLPGATAAECASNKKIYTVQTVQIFWSVYNNIPVTSPLPLRC-----SYHLMRGERRPLWEEESNAKGGVWKMVKP-----KDSTSTVWKELLATIGEQTDCAAADDEVIGVSV 166  
*M.musculus\_4E1* 33 HYIKHPLQNRWALWFF--KND---KSKTWQANLRLISKFDTVEDFWALYNHIQLSSNLMPGC-----DYSLFDKDGIEPMWEDEKNKRGGRWLITLTKQ-QRRSDLDRFWLETLLCLIGESFDDY---SDDVCGAVV 154  
*X.laevis\_4E* 29 QYIKHPLQNRWALWFF--KND---KSKTWQANLRLISKFDTVEDFWALYNHIQLSSNLMMSGC-----DYSLFDKDGIEPMWEDEKNKRGGRWLITLTKQ-QRRNDLDRFWLETLMCLIGESFDEH---SDDVCGAVV 150  
*A.thaliana\_4E1* 56 VPESHPLHSWTFWFD--NPAVKSQKTSWGSRLRPVFTFSVVEEFWSLYNNMKHPSKLAHGA-----DFYCFKHIEPKWEDPICANGGKWTMTFF-----KEKSDKSWLYTLLALIGEQFDH---GDEICGAVV 175  
*A.thaliana\_4E2* 61 IQKSHCFQNSWTFWFD--NPSSKSNQVIWGSRLRSLYTFATIEEFWSLYNNIHPPTKVVSGS-----DLYCFKDKIEPKWEDPICANGGKWTMFFP-----RATLESNWLNTLLALVGEQFDQ---GDEICGAVL 180  
*A.thaliana\_4E3* 61 IQKSHCFQNSWTFWFD--NPSSKSNQVIWGSRLRSLYTFGTIEEFWSLYNNIHPPTKVVSGA-----DLYCFKDKIEPKWEDPICANGGKWSMMFP-----KATLECNWLNTLLALVGEQFDQ---GDEICGAVL 180  
*A.thaliana\_iso4E* 24 --QPHKLERKWSFWFD--NQSKKG--AAWGASLRKAYTFDTVEDFWGLHETIFQTSKLTANA-----EIHLFKAGVEPKWEDPEACANGGKWTWVVT--ANRKEALDKGWLETLMALIGEQFDE---ADEICGVVA 142  
*Z.mays\_4E1* 39 PPATHPLEHSWTFWFD--NPQSKSKQAAGSSIRPIHTFSTVEEFWGLYNNINHPSKLIVGA-----DFHCFKNKIEPKWEDPICANGGKWTISCG-----RGKSDTFWLHTLLAMIGEQFDY---GDEICGAVV 158  
*O.sativa\_4E1* 48 PAAPHPLEHAWTFWFD--NPQGKSKQATWGSIRPIHTFSTVEDFWSLYNNIHHPSKLVVGA-----DFHCFKNKIEPKWEDPICANGGKWTFSCG-----RGKSDTMWLHTLLAMIGEQFDY---GDEICGAVV 167  
*S.cerevisiae\_4E* 33 FDVKHPLNTKWTWLYT--KPAVDK-SESWSDLLRPVTSFQTVVEFWAIIQNIPEPHELPLKS-----DYHVFERNDRPEWEDEANAKGGKWSFQLR--GKG-ADIDELWLRTLLAVIGETIDED---DSQINGVVL 154  
*S.pombe\_4E1* 34 FNLKHPLARPWTLWFL--MPPTP--GLEWNELOQNIITFNSVEEFWGIHNNINPASSLPIKS-----DYSFFREGVRPEWEDVHNTGGKWFQNK--GRGGNALDEMWTTLVLAIGETLDPT---GQEVGMVVI 155  
*D.discoideum\_4E* 70 NLIKHPLOQRWVSLWYD--YQSGKINPEHWVDSLKKVISFDSVEDFWCVFNILPNVSNLKQGS-----SYHLFKDDIEPKWEHESNKRGGKWFVMVKDK-SR---CDNQWLQSVMACVGETFDS---SDEICGIVY 190  
*T.gondii\_4E1* 1 -DEPLPLRYVWHVWEQ---VQQDDRSKEYSDNTRDLAAFDTVQKFWQLWSFIPQPSELLDHKRMVRQDKNGRSHVVDAMI FKEGIKPMWEDPRNATGGHFEYRLSFPQMSAGQIDEYWNVLVGLIGSTVEG---SDHITGVRL 138  
*T.gondii\_4E2* 20 QAVMENLRDATLAAFP-----ETTRVYASRLRGLSCFSTVEGEFRYMRCLARPSQLPGEC-----LLQLFRKGCWPLWEFFPS--GGSWSLRVKKPGCSARTVDGLWETLVLACIGETFEM-----PEVVGVVV 136  
*T.gondii\_4E3* 1 -----QEEYEQGLERVGRMSWTAVSPFLAWWLPASASRGNLH-----NLCFFKNPVKPLWEHPENIKGGHFEALRRF---AAKTTVQEMFLLLASTVLKDESVDG---AVRHCNGIVL 101

*H.sapiens\_4E1* 155 NVR-----AKGDKIAIWTTECENREAVTHIGRVYKERLGLPPKIVIGYQSHADTATKSGSSTTKNRFVV 217  
*H.sapiens\_4EHP* 172 SVR-----FQEDIISIWNKTASDQATTARIRDTLRRVLNLPNTIMEYKTHTDSIKMPGRLGPQRLLF 245  
*H.sapiens\_4E3* 167 SVR-----DREDVVQVWNVNASLVGEATVLEKIYELLPHITFKAVFYKPHEEHAFEGGRGKH----- 224  
*M.musculus\_4E1* 155 NVR-----AKGDKIAIWTTECENRAVTHIGRVYKERLGLPPKIVIGYQSHADTATKSGSSTTKNRFVV 217  
*X.laevis\_4E* 151 NVR-----AKGDKIAIWTTEFENKDAVTHIGRVYKERLGLPAKVIGYQSHADTATKSGSSTTKNRFVV 213  
*A.thaliana\_4E1* 176 NIR-----GKQERISIWTKNASNEAAQVSIGKQWKEFLDYNSIGF---IHEDAKKLDLDRNAKNAYTA 235  
*A.thaliana\_4E2* 181 NFR-----TRGDRIISLWTKKAANEEAQLSIGKQWKELLGYNDTIGF---IVHEDAKTLDLDRDAKRRYTV 240  
*A.thaliana\_4E3* 181 NFR-----ARGDRIISLWTKNAANEEAQLSIGKQWKELLGYNETIGF---IVHEDAKTLDLDRDAKRRYTV 240  
*A.thaliana\_iso4E* 143 SVRP---QSKQDKLSLWTRTKSNEAVLMGIGKKWKEILDVTDKITF---NNHDDSR-----RSRFTV 198  
*Z.mays\_4E1* 159 SVR-----GKQERIAIWTKNAANEEAQVSIGKQWKELLDYKDSIGF---IVHDDAKKMDKGLKERYTV 218  
*O.sativa\_4E1* 168 SVR-----GKQERIAIWTKNAANEEAQISIGKQWKEFLDYKDSIGF---IVHDDAKKMDKGLKNRYTV 227  
*S.cerevisiae\_4E* 155 SIR-----KGGNKFALWTKS-EDKEPLLRIIGGKFKQVLKLTDDGHLEFFPH--SSANG-RHPQPSITL 213  
*S.pombe\_4E1* 156 NMR-----KGFYRLAVWTKSCNNREVLMEIGTRFKQVLNLPSETIEFSAHEDSSKSGSTRAKTRMSV 218  
*D.discoideum\_4E* 191 NSR-----KNGDKISVWTKTAQDEKATRDVGNCLKKILEIDQTIQY---TPHEDFIRSSKGSKNLYEC 250  
*T.gondii\_4E1* 139 VDKLSQGRHSCIRIEVWYSKLPSSREVQDALLKEINKCMATKIDGSGVGTLPRAVDK----- 193  
*T.gondii\_4E2* 137 QSK-----AKEFVLSLWIDSCPNAAEQKRIGEKLQLCRIRGNLSFQFKSFQ----- 183  
*T.gondii\_4E3* 102 CIR---HHWRKHKIEFWTASLDSGVLAQQEGLLRLLSQLPGSAGHGVELEFISHREVVQ----- 158

**eIF4G-binding region (S/TVxxF)**  
**Conserved aromatic residues (8 total)**  
**Coordinates m7G binding**  
**PTM residue**

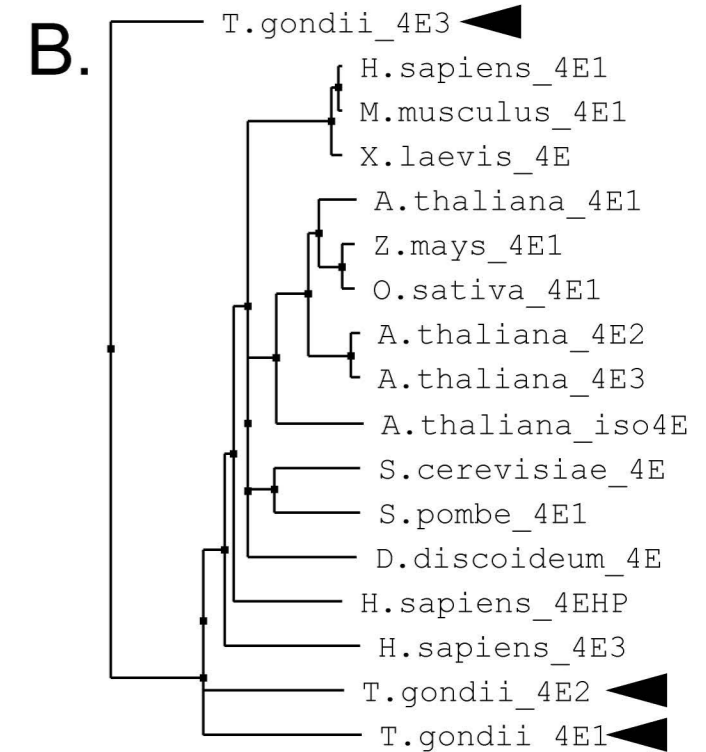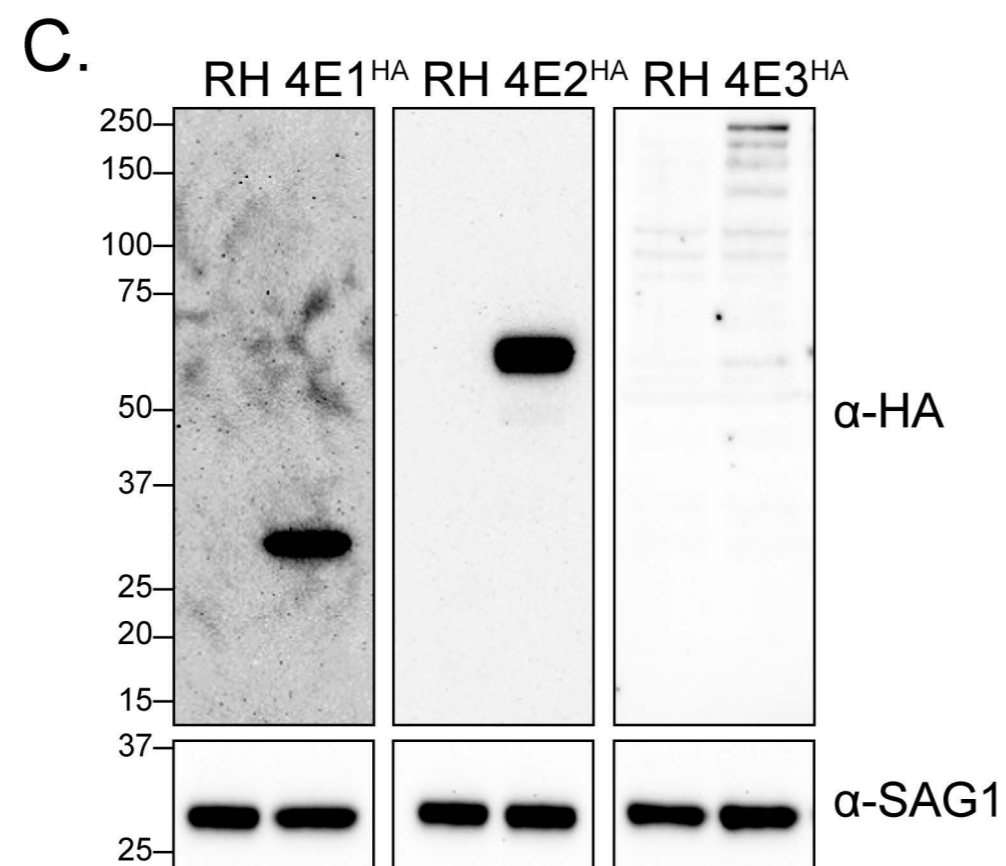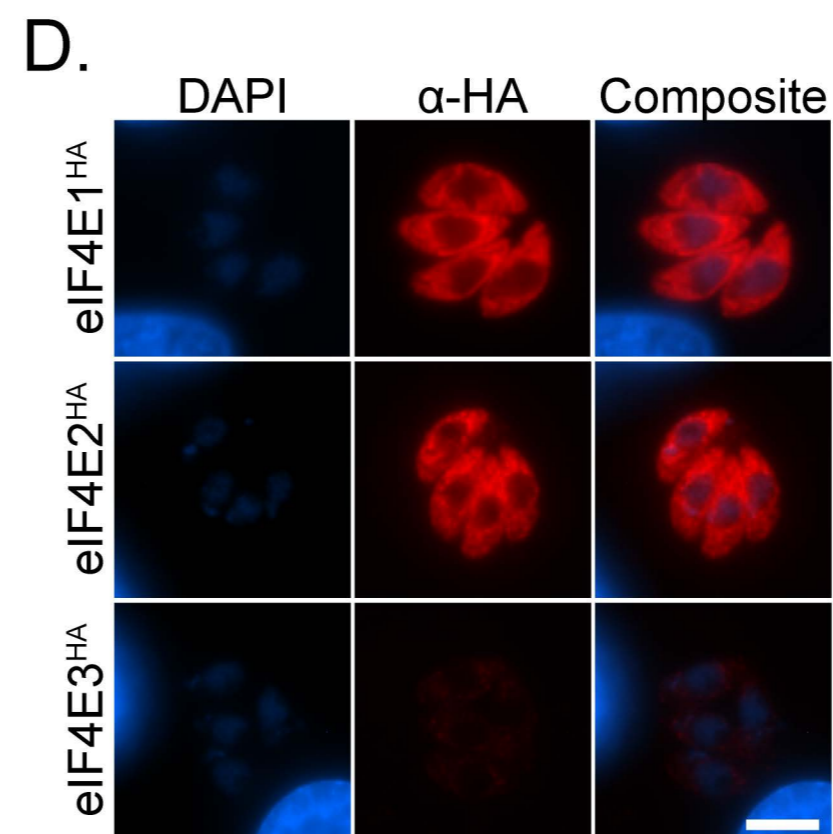

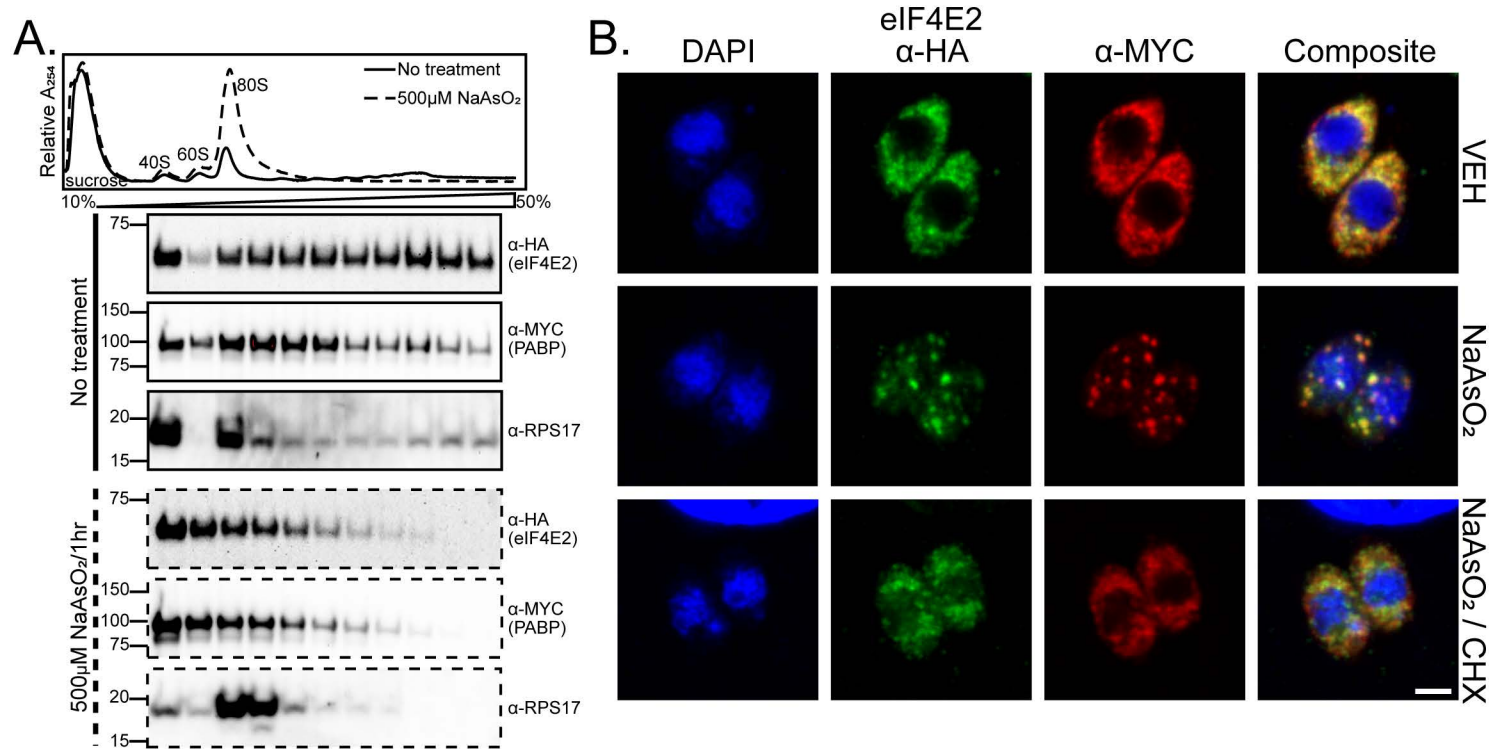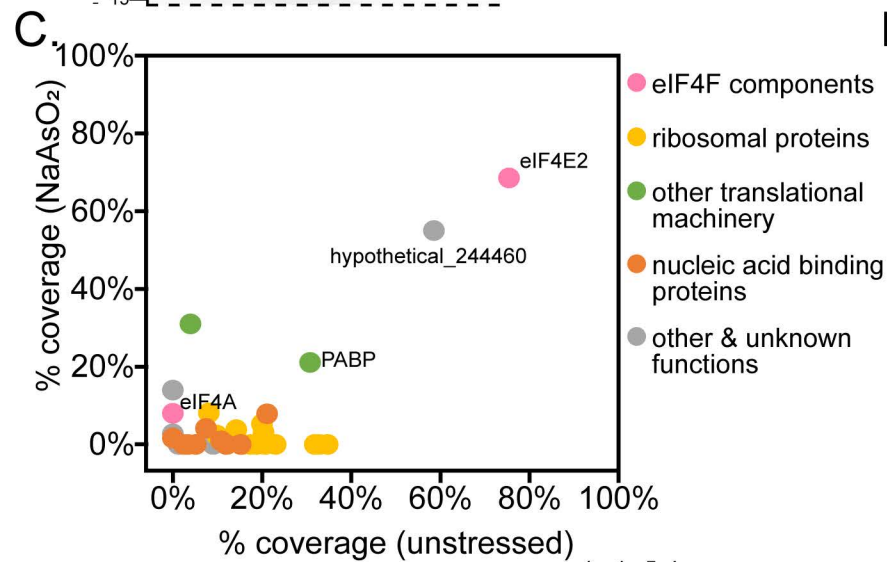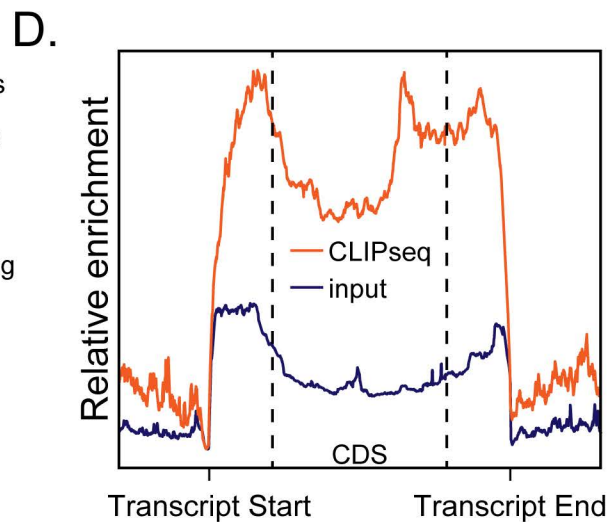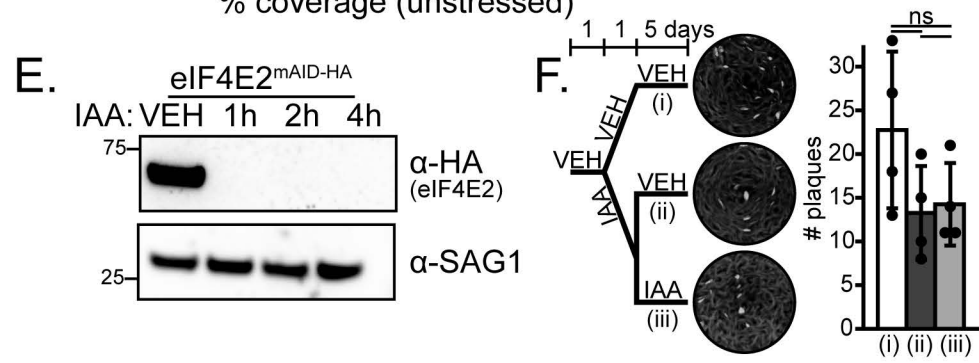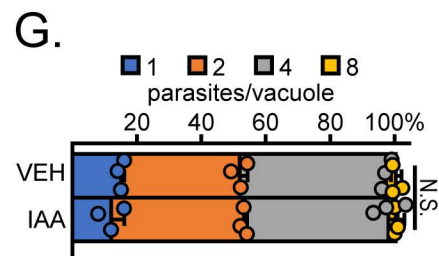

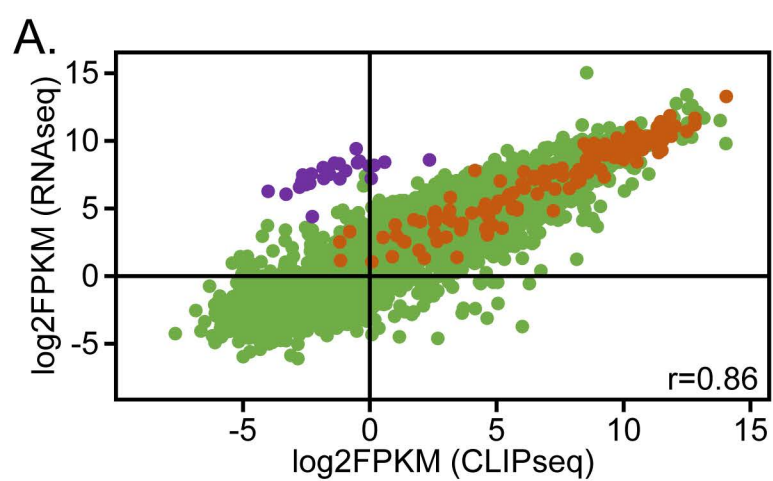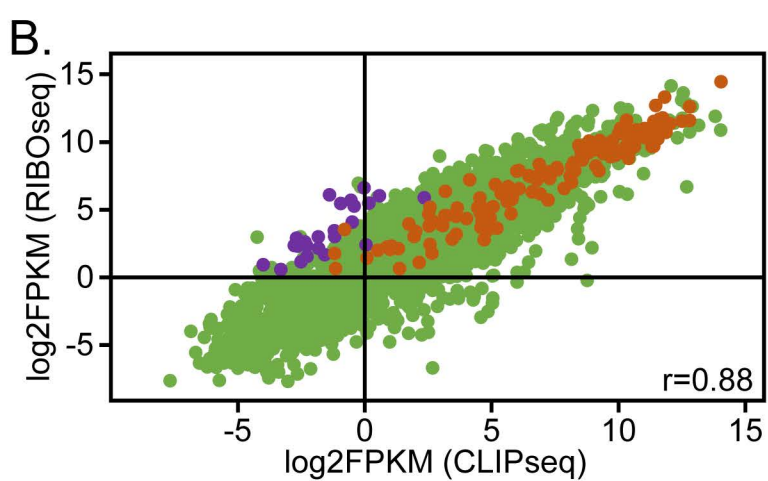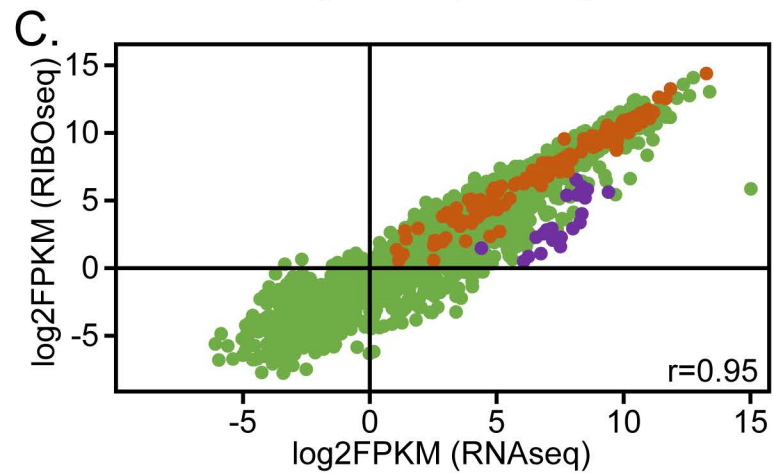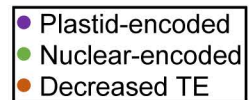

% signal

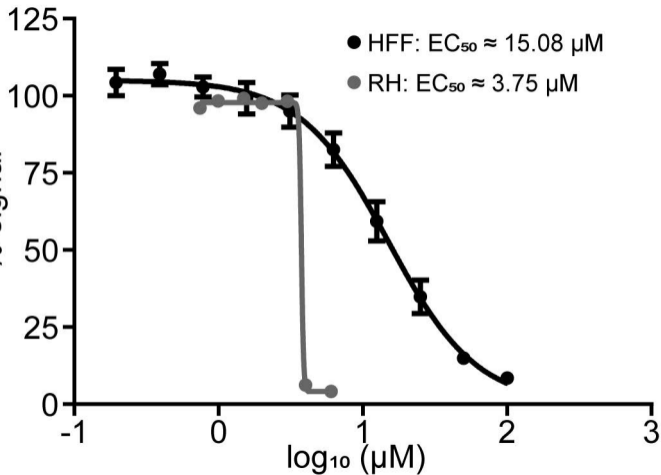

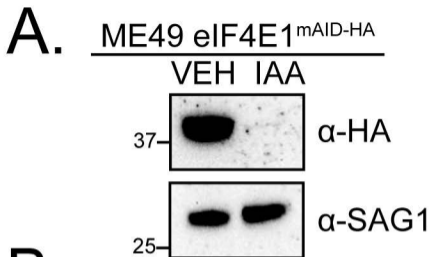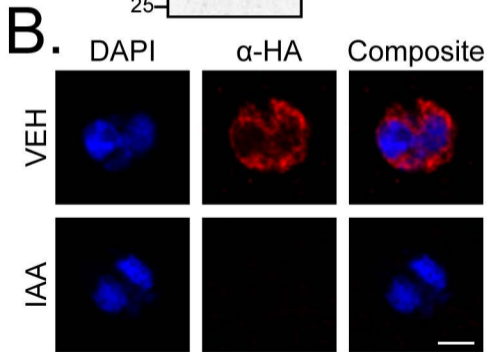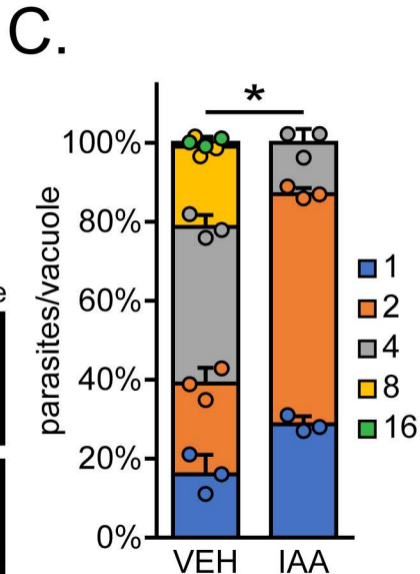

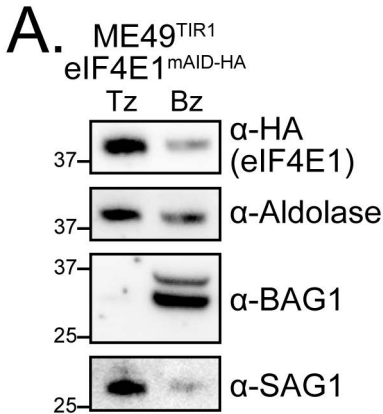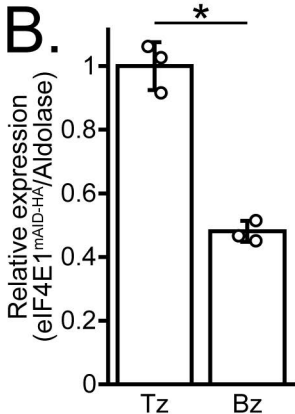

Supplement: mbio.02954-23-s0001.pdf [file mbio.02954-23-s0001.pdf]
